# Supplementary material
Source: ML conference proceedings conference paper supplement (https://openaccess.thecvf.com/content/CVPRW_2020/html/Mi_Generalized_Class_Incremental_CVPRW_2020_paper.html)
Supplement: Supplementary file 1 [file Mi_Generalized_Class_Incremental_CVPRW_2020_supplemental.pdf]

# Appendix for “Generalized Class Incremental Learning”

Fei Mi\*    Lingjing Kong\*    Tao Lin    Kaicheng Yu    Boi Faltings

École Polytechnique Fédérale de Lausanne (EPFL)

{fei.mi, lingjing.kong, tao.lin, kaicheng.yu, boi.faltings}@epfl.ch

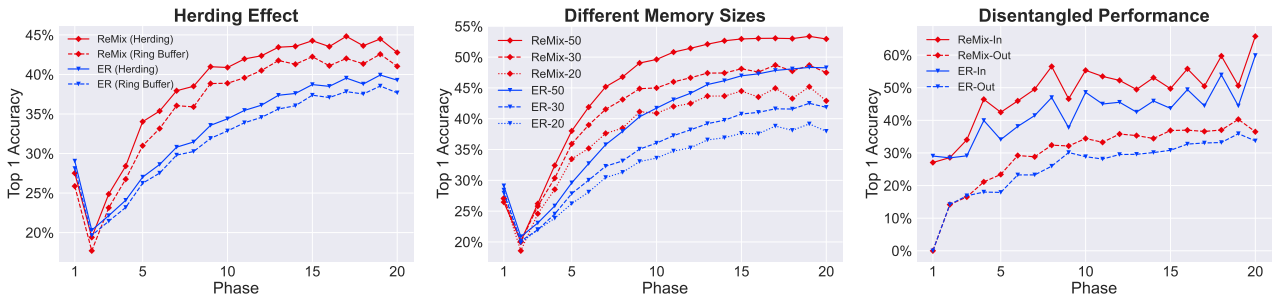

Figure 1. **Left:** Herding v.s. ring buffer to select exemplars for *ReMix* and *ER*. **Middle:** Performance of *ReMix* and *ER* with varying exemplar sizes. **Right:** Disentangled performance comparing *ReMix* with *ER*.

## A. Detailed analysis on *ReMix*

In this section, we provide detailed analysis of *ReMix* to understand its success in GCIL settings. As a case study, we limit our discussion within the setup where  $K_t \sim \mathcal{U}(1, 100)$ ,  $\mathbf{W}_t^1 = \text{UNIFORM}$ ,  $\mathbf{W}_t^2 = \text{TASK-VARIED}$ .

### A.1. Herding is effective.

In this experiment, we test another exemplar management scheme which employs a *Ring Buffer* to store exemplars for each class. The performance comparison of these two exemplar management schemes used in *ER* and *ReMix* is presented in Figure 1 (Left). We can see that *Herding* is consistently better than *Ring Buffer* across all incremental training phases for both *ReMix* and *ER*.

### A.2. Different memory sizes.

In Figure 1 (Middle), we show the effects of different sizes of exemplars (20, 30, 50) per class used by *Herding*. The increased exemplar size improves both *ER* and *ReMix*. Nevertheless, *ReMix* is consistently superior to *ER* with different exemplar sizes.

### A.3. Disentangled performance.

In Figure 1 (Right), we show the performance on classes in the current phase (*in-phase* classes) and not in the current phase (*out-phase* classes) separately. Improvements on *out-phase* classes demonstrate that *ReMix* further alleviates catastrophic forgetting classes not in the current phase. Improvements on *in-phase* classes show that *ReMix* improves sample efficiency to quickly learn classes in the phase.

---

\*Equal contribution
